# Supplementary material
Source: PubMed Central journal article supplement (PMC2940976)
Supplement: NIHMS230537-supplement-02.pdf [file NIHMS230537-supplement-02.pdf]

| <b>Gene</b>                     | <b>Right primer</b>       | <b>Left primer</b>      | <b>Amplicon</b> | <b>UPL Probe #</b> |
|---------------------------------|---------------------------|-------------------------|-----------------|--------------------|
| <i>agrln</i>                    | tcactcccctgttcacaataa     | ttagcattaacggcaaagacc   | 60 nt           | 82                 |
| <i>cntn2</i>                    | cgttattcacttcaacacgatcc   | caaaccagaccaccatt       | 77 nt           | 36                 |
| <i>ntf3</i>                     | cctgtttgtaacccaattgct     | tgccgagcacaagagcta      | 70 nt           | 91                 |
| <i>sema3d</i>                   | aaagtaggatcccgcacg        | gtggaccaccgtcaagaga     | 102 nt          | 36                 |
| <i><math>\beta</math> actin</i> | ggcagcgatttcctcatc        | tcactcccctgttcacaataa   | 60 nt           | 76                 |
| <i>gapdh</i>                    | catgtaatcaaggatcaatgaatgg | caggcataatggtaaagttggta | 131 nt          | 147                |

Supplemental data Table 1: Primers used for q-RT-PCR analysis. Nucleotide sequence of right and left primers are shown. Size of amplicon and Roche UPL probe used are noted.
